# Supplementary material for: Effects of contaminants of emerging concern on Megaselia scalaris (Lowe, Diptera: Phoridae) and its microbial community
Source: PubMed Central journal article supplement (PMC5557979; doi:10.1038/s41598-017-08683-7), 2017-08-15

Effects of contaminants of emerging concern on *Megaselia scalaris* (Lowe, Diptera: Phoridae) and its microbial community

Marcus J. Pennington<sup>ab\*</sup>; Jason A. Rothman<sup>ad</sup>; Michael B. Jones<sup>a</sup>; Quinn S. McFrederick<sup>ad</sup>; Jay Gan<sup>bc</sup>; John T. Trumble<sup>ab</sup>

<sup>a</sup> Department of Entomology, University of California, Riverside, CA 92521, USA

<sup>b</sup> Graduate Program in Environmental Toxicology, University of California, Riverside, CA 92521, USA

<sup>c</sup> Department of Environmental Chemistry, University of California, Riverside, CA 92521, USA

<sup>d</sup> Graduate Program in Microbiology, University of California, Riverside, CA 92521, USA

\* Corresponding Author: 417 Entomology Building, University of California, Riverside, CA, 92521, USA, mpenn001@ucr.edu

Running Head: *Megaselia scalaris* biology and microbial communities affected by CECs

Supp. Figure 1: Heatmap, after removing the family *Pseudomonadaceae*, of the top 5% proportionately most abundant families by average OTUs of treat life-stage pairing. Increased red coloration is an increase in proportional abundance.

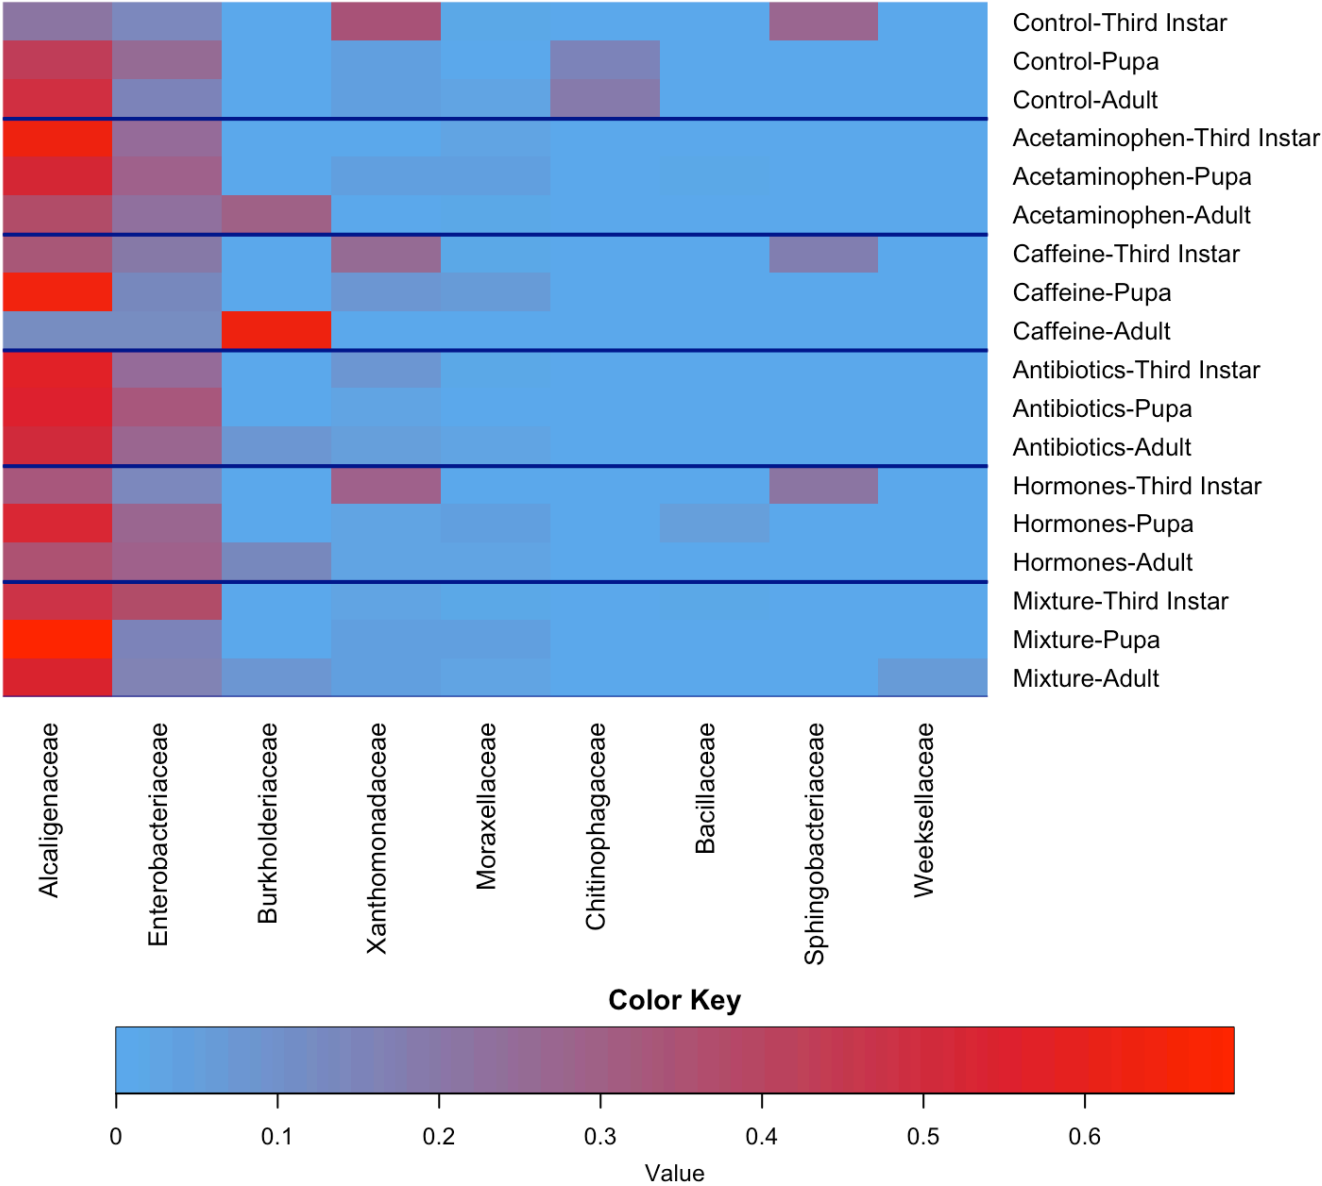

Supp. Figure 2: Non-metric multidimensional scaling plots of dissimilarities in treatments by life-stage.

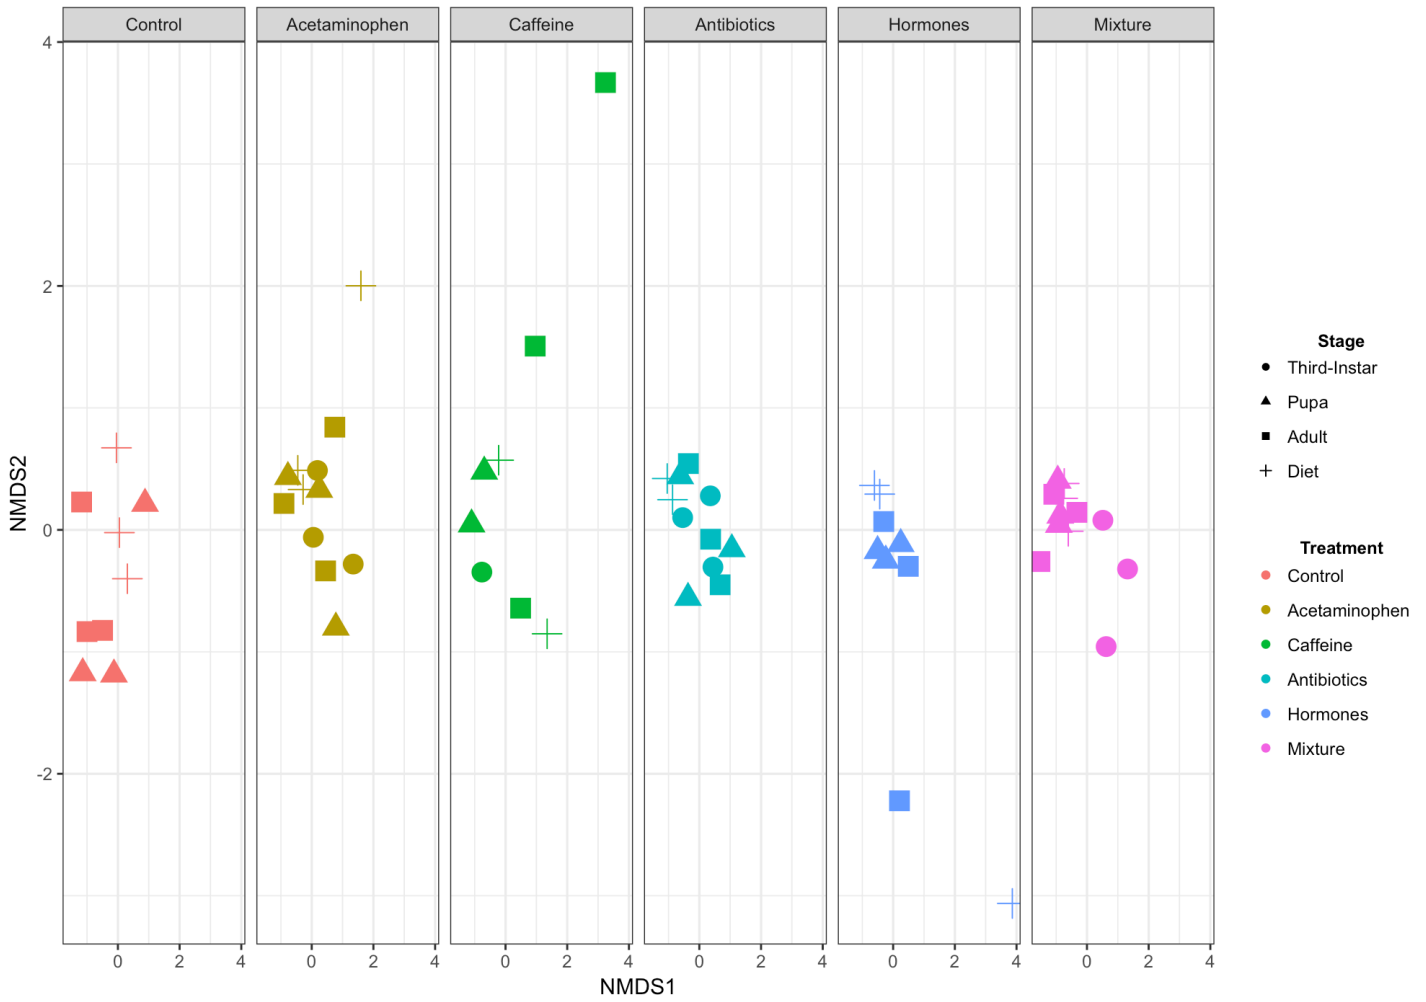

Supplement: 41598_2017_8683_MOESM1_ESM.pdf [file 41598_2017_8683_MOESM1_ESM.pdf]
